# Supplementary material
Source: PubMed Central journal article supplement (PMC4913551)
Supplement: NIHMS794823-supplement-T1.pdf [file NIHMS794823-supplement-T1.pdf]

| Table S1. Genes that are more than 2-fold downregulated in <i>Dlx5/6</i> <sup>-/-</sup> mdBA1 compared with the wild type |                         |                      |                     |
|---------------------------------------------------------------------------------------------------------------------------|-------------------------|----------------------|---------------------|
| Gene title                                                                                                                | Gene symbol             | In situ verification | Average fold change |
| distal-less homeobox 5                                                                                                    | <i>Dlx5</i>             | Known                | -75.81673608        |
| distal-less homeobox 6                                                                                                    | <i>Dlx6</i>             | Known                | -70.1967987         |
| G-protein-coupled receptor 50                                                                                             | <i>Gpr50</i>            |                      | -25.59478137        |
| distal-less homeobox1 antisense                                                                                           | <i>Dlx1 A/S</i>         | Yes                  | -16                 |
| gastrulation brain homeobox 2                                                                                             | <i>Gbx2</i>             | Yes                  | -15.75543605        |
| RIKEN cDNA A730090H04 gene                                                                                                | <i>A730090H04Rik</i>    |                      | -11.40117896        |
| goosecoid                                                                                                                 | <i>Gsc</i>              | Known                | -11.3137085         |
| heart and neural crest derivatives expressed transcript 2                                                                 | <i>Hand2</i>            | Known                | -10.63767611        |
| Riken cDNA 7120458G20 (LOC434315)                                                                                         | <i>7120458G20Rik</i>    |                      | -10.4750766         |
| BMP-binding endothelial regulator                                                                                         | <i>Bmper, Cv2</i>       | Yes                  | -8.5741877          |
| aristaless 3                                                                                                              | <i>Alx3</i>             | Yes                  | -7.580128063        |
| transient receptor potential cation channel, subfamily M, member 1                                                        | <i>Trpm1/melastatin</i> |                      | -6.498019171        |
| sonic hedgehog regulated sequence/Evf1/2                                                                                  | <i>Evf1/2</i>           | Yes                  | -6.01635163         |
| distal-less homeobox 4                                                                                                    | <i>Dlx4</i>             | Yes                  | -5.656854249        |
| paired-like homeodomain transcription factor 1                                                                            | <i>Pitx1</i>            | Known                | -4.702191625        |
| distal-less homeobox 3                                                                                                    | <i>Dlx3</i>             | Known                | -4.455401837        |
| serum deprivation response                                                                                                | <i>Sdpr</i>             |                      | -4.421219754        |
| Cbp/p300-interacting transactivator with Glu/Asp-rich C-terminal domain1                                                  | <i>Cited1</i>           | Yes                  | -3.969311785        |
| heart and neural crest derivatives expressed transcript 1                                                                 | <i>Hand1</i>            | Yes                  | -3.848895348        |
| regulator of G-protein signaling 5                                                                                        | <i>Rgs5</i>             | Yes                  | -3.848895348        |
| hepatocyte growth factor (scatter factor)                                                                                 | <i>Hgf/Sf</i>           | Yes                  | -3.174802104        |
| T-box 22                                                                                                                  | <i>Tbx22</i>            | False positive       | -2.985096929        |
| unc-5 homolog C ( <i>C. elegans</i> )                                                                                     | <i>Unc5c</i>            | Yes                  | -2.985096929        |
| protein tyrosine phosphatase, receptor type Z, polypeptide 1                                                              | <i>Ptprz1</i>           |                      | -2.785193917        |
| procollagen, type VIII, alpha 2                                                                                           | <i>Col8a2</i>           |                      | -2.785193917        |
| peripheral myelin protein                                                                                                 | <i>Pmp22</i>            |                      | -2.76382576         |
| zinc binding alcohol dehydrogenase, domain containing 2                                                                   | <i>Zadh2</i>            |                      | -2.72158            |
| leucine rich repeat containing 17                                                                                         | <i>Lrrc17</i>           |                      | -2.659419027        |
| expressed sequence AW551984                                                                                               | <i>AW551984</i>         |                      | -2.61876915         |
| insulin-like growth factor 2, antisense                                                                                   | <i>Igf2as</i>           |                      | -2.578740617        |
| epidermal growth factor-containing fibulin-like extracellular matrix protein1                                             | <i>Efemp1</i>           |                      | -2.55895638         |
| pleiomorphic adenoma gene-like 1, Zac1, Lot1                                                                              | <i>Zac1 (Plagl1)</i>    | Yes                  | -2.55895638         |
| cDNA sequence BC005512                                                                                                    | <i>BC005512</i>         |                      | -2.55895638         |
| hypothetical protein C130007D14                                                                                           | <i>C130007D14</i>       |                      | -2.539323929        |
| integral membrane protein 2A                                                                                              | <i>Itm2a</i>            |                      | -2.443398014        |
| delta-like 1 homolog ( <i>Drosophila</i> )                                                                                | <i>Dlk1</i>             |                      | -2.406050072        |
| calpain 6                                                                                                                 | <i>Capn6</i>            |                      | -2.369273002        |
| RIKEN cDNA 2610028F08 gene                                                                                                | <i>2610028F08Rik</i>    |                      | -2.315158732        |
| inactive X specific transcript                                                                                            | <i>Xist</i>             |                      | -2.244924097        |

Grey shading indicates that the changes in expression were verified by in situ hybridization.
