# Supplementary material
Source: PubMed Central journal article supplement (PMC4913551)
Supplement: NIHMS794823-supplement-T2.pdf [file NIHMS794823-supplement-T2.pdf]

**Table S2. Genes that are more than 2-fold upregulated in *Dlx5/6*<sup>-/-</sup> mdBA1 compared with the wild type**

| Gene title                                             | Gene symbol          | In situ verification | Average fold change |
|--------------------------------------------------------|----------------------|----------------------|---------------------|
| proline-rich acidic protein 1                          | <i>Prap1</i>         |                      | 115.8051462         |
| guanylate cyclase activator 2b (retina)                | <i>Guca2b</i>        |                      | 12.89633204         |
| Riken cDNA 2900092D14                                  | <i>2900092D14Rik</i> | Yes                  | 7.817279747         |
| transmembrane protein 30B                              | <i>Tmem30b</i>       | Yes                  | 6.498019171         |
| Riken cDNA 2610017I09                                  | <i>2610017I09Rik</i> | Yes                  | 4.924577653         |
| inter-alpha (globulin) inhibitor H5                    | <i>Itih5</i>         |                      | 4.775181453         |
| POU domain, class 3, transcription factor 3            | <i>Pou3f3</i>        | Yes                  | 4.666116158         |
| T-box18                                                | <i>Tbx18</i>         |                      | 4.630317464         |
| Transcribed locus, weakly similar to XP_311625.1       | <i>E330015D05Rik</i> | Yes                  | 4.421219754         |
| Forkhead family transcription factor I2                | <i>Foxl2</i>         | Yes                  | 4.353640318         |
| Secreted phosphoprotein 1                              | <i>Spp1</i>          |                      | 3.848895348         |
| cytochrome P450, family 26, subfamily a, polypeptide 1 | <i>Cyp26a1</i>       | Yes                  | 3.618910819         |
| RIKEN cDNA 4631408O11 gene                             | <i>4631408O11Rik</i> |                      | 3.618910819         |
| early B-cell factor 2                                  | <i>Ebf2</i>          | False positive       | 3.376563187         |
| Nerve growth factor receptor                           | <i>Ngfr</i>          |                      | 3.376563187         |
| thrombospondin, type I, domain 2                       | <i>Thsd2</i>         |                      | 3.324951585         |
| insulin-like growth factor 1                           | <i>Igf1</i>          |                      | 3.150444852         |
| RIKEN cDNA 1110018M03 gene                             | <i>1110018M03Rik</i> |                      | 3.054870262         |
| hyaluronan synthase 2                                  | <i>Has2</i>          |                      | 2.598677813         |
| Iroquois related homeobox 5 (Drosophila)               | <i>Irx5</i>          | Yes                  | 2.481325691         |
| brain derived neurotrophic factor                      | <i>Bdnf</i>          |                      | 2.443398014         |
| secreted frizzled-related sequence protein 2           | <i>Sfrp2</i>         |                      | 2.29739671          |
| Lim homeobox protein 6                                 | <i>Lhx6</i>          |                      | 2.193649959         |
| phosphatidic acid phosphatase type 2B                  | <i>Ppap2b</i>        |                      | 2.176820159         |

Grey shading indicates that the changes in expression were verified by in situ hybridization.
