# Supplementary material
Source: PubMed Central journal article supplement (PMC4913551)
Supplement: NIHMS794823-supplement-T3.pdf [file NIHMS794823-supplement-T3.pdf]

| Table S3. Dlx-binding motifs from the literature |                                                                |                                 |                                              |
|--------------------------------------------------|----------------------------------------------------------------|---------------------------------|----------------------------------------------|
| Dlx binding motif                                | Source of the motif; tissue in which the cis-element is active | Evidence for direct Dlx binding | Reference                                    |
| (A/C/G)TAATT(G/A)(C/G)                           | Synthetic oligonucleotides                                     | EMSA (SELEX)                    | (Feledy et al., 1999)                        |
| CTAATTGA<br>GTAATTAT                             | <i>Wnt1</i> enhancer; brain                                    | DNase I foot printing           | (Iler et al., 1995)                          |
| ATAATTAG<br>ATAATTAC                             | <i>Dlx5/6</i> enhancer; brain and branchial arch               | EMSA, ChIP                      | (Zerucha et al., 2000;<br>Zhou et al., 2004) |
| ATAATCAG                                         | <i>Hand2</i> ; branchial arch                                  | EMSA                            | (Charite et al., 2001)                       |
| GTAATTCG<br>ATAATAAT<br>TTAATTTT                 | <i>Runx2</i> promoter; bone                                    | EMSA                            | (Lee et al., 2005)                           |
| ATAATTAT                                         | <i>Nrp2</i> promoter; brain                                    | EMSA, ChIP                      | (Le et al., 2007)                            |
| ATAATTAC<br>GTAATTAT                             | <i>Dlx1/2</i> enhancer; brain                                  | EMSA                            | (Poitras et al., 2007)                       |
| GTAATTAC<br>CTAATGAA                             | <i>Trkb</i> promoter; eye                                      | EMSA, ChIP                      | (De Melo et al., 2008)                       |

ChIP, chromatin immunoprecipitation; EMSA, electrophoretic mobility shift assay; SELEX, systematic evolution of ligands by exponential enrichment.

## References

- de Melo, J., Zhou, Q.-P., Zhang, Q., Zhang, S., Fonseca, M., Wigle, J. T. and Eisenstat, D. D. (2008). Dlx2 homeobox gene transcriptional regulation of *Trkb* neurotrophin receptor expression during mouse retinal development. *Nucleic Acids Res.* **36**, 872-884.
- Iler, N., Rowitch, D. H., Echelard, Y., McMahon, A. P. and Abate-Shen, C. (1995). A single homeodomain binding site restricts spatial expression of *Wnt-1* in the developing brain. *Mech. Dev.* **53**, 87-96.
- Le, T. N., Du, G., Fonseca, M., Zhou, Q.-P., Wigle, J. T. and Eisenstat, D. D. (2007). Dlx homeobox genes promote cortical interneuron migration from the basal forebrain by direct repression of the semaphorin receptor neuropilin-2. *J. Biol. Chem.* **282**, 19071-19081.
- Lee, M.-H., Kim, Y.-J., Yoon, W.-J., Kim, J.-I., Kim, B.-G., Hwang, Y.-S., Wozney, J. M., Chi, X.-Z., Bae, S.-C., Choi, K.-Y. et al. (2005). Dlx5 specifically regulates *Runx2* Type II expression by binding to homeodomain-response elements in the *Runx2* distal promoter. *J. Biol. Chem.* **280**, 35579-35587.
- Poitras, L., Ghanem, N., Hatch, G. and Ekker, M. (2007). The proneural determinant MASH1 regulates forebrain *Dlx1/2* expression through the I12b intergenic enhancer. *Development* **134**, 1755-1765.
- Zerucha, T., Stuhmer, T., Hatch, G., Park, B. K., Long, Q., Yu, G., Gambarotta, A., Schultz, J. R., Rubenstein, J. R. and Ekker, M. (2000). A highly conserved enhancer in the *Dlx5/Dlx6* intergenic region is the site of cross-regulatory interactions between *Dlx* genes in the embryonic forebrain. *J. Neurosci.* **20**, 709-721.
- Zhou, Q.-P., Le, T. N., Qiu, X., Spencer, V., de Melo, J., Du, G., Plews, M., Fonseca, M., Sun, J. M., Davie, J. R. and Eisenstat, D. D. (2004). Identification of a direct Dlx homeodomain target in the developing mouse forebrain and retina by optimization of chromatin immunoprecipitation. *Nucleic Acids Res.* **32**, 884-892.
